# Supplementary material for: Nanoscale photosensitizer with tumor-selective turn-on fluorescence and activatable photodynamic therapy treatment for COX-2 overexpressed cancer cells
Source: Royal Society of Chemistry journal article supplement (doi:10.1039/d0tb02828b), 2021-01-01
Supplement: d0tb02828b1.pdf [file d0tb02828b1.pdf]

## Supporting Information

for

### **Nanoscale photosensitizer with tumor-selective turn-on fluorescence and activatable photodynamic therapy treatment for COX-2 overexpressed cancer cells**

Lan Wang, Yuhuan Zhang, Ying Han, Qi Zhang, Zhenfu Wen, Hongjuan Li, Shiguo  
Sun, Xin Chen and Yongqian Xu\*

Shaanxi Key Laboratory of Natural Products & Chemical Biology, College of  
Chemistry & Pharmacy, Northwest A&F University, Yangling, Shaanxi, 712100, P.R.  
China

\*Corresponding author (E-mail address: xuyq@nwsuaf.edu.cn)

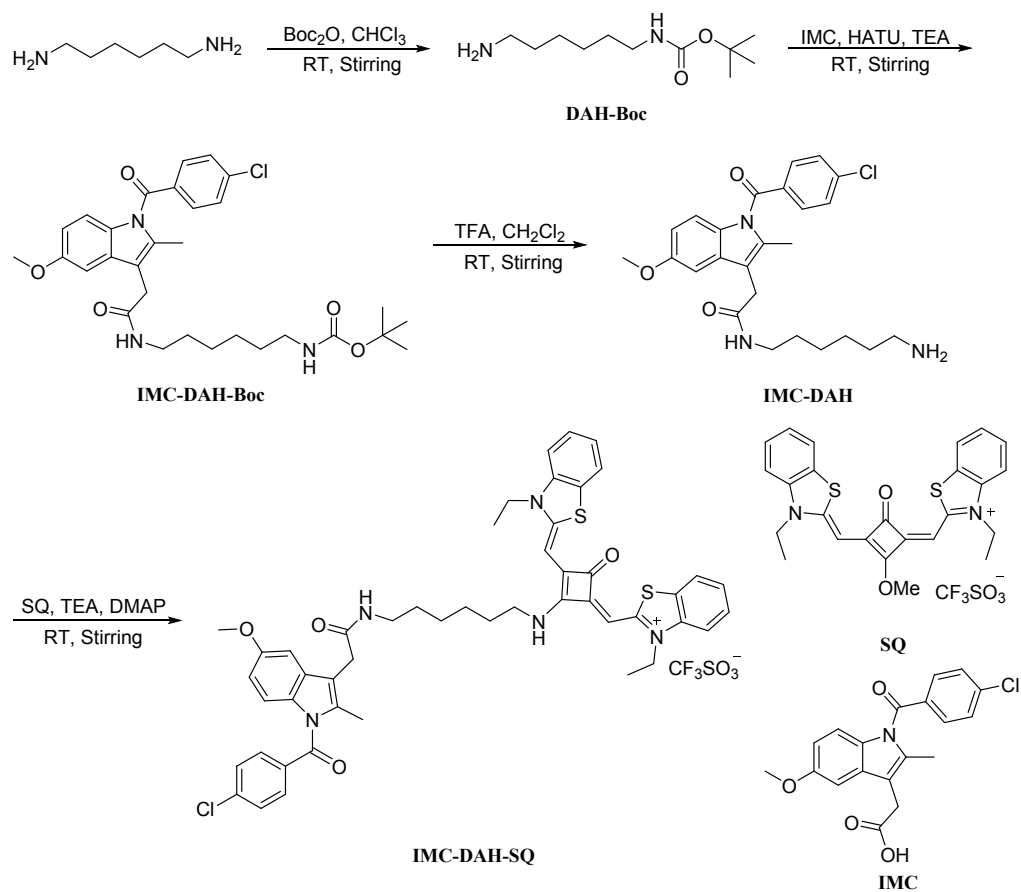

**Scheme S1.** The synthetic route of **IMC-DAH-SQ**.

**Table S1.** Spectroscopic properties of **IMC-DAH-SQ** in different solvents.

| Solvent                  | $\lambda_{\text{abs}}$ (nm) | $\lambda_{\text{em}}$ (nm) | $\Phi$ |
|--------------------------|-----------------------------|----------------------------|--------|
| EtOH                     | 663                         | 686                        | 0.10   |
| DMSO                     | 673                         | 696                        | 0.11   |
| $\text{CH}_2\text{Cl}_2$ | 668                         | 689                        | 0.18   |
| Dioxane                  | 667                         | 690                        | 0.38   |
| EtOAc                    | 667                         | 688                        | 0.20   |
| $\text{H}_2\text{O}$     | 607/654                     | 671                        | 0.03   |

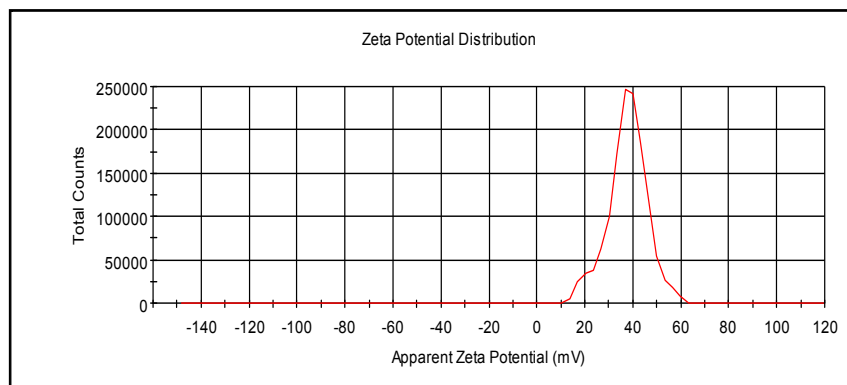

**Fig. S1.** The Zeta Potential Distribution of **IMC-DAH-SQ** in aqueous solution.

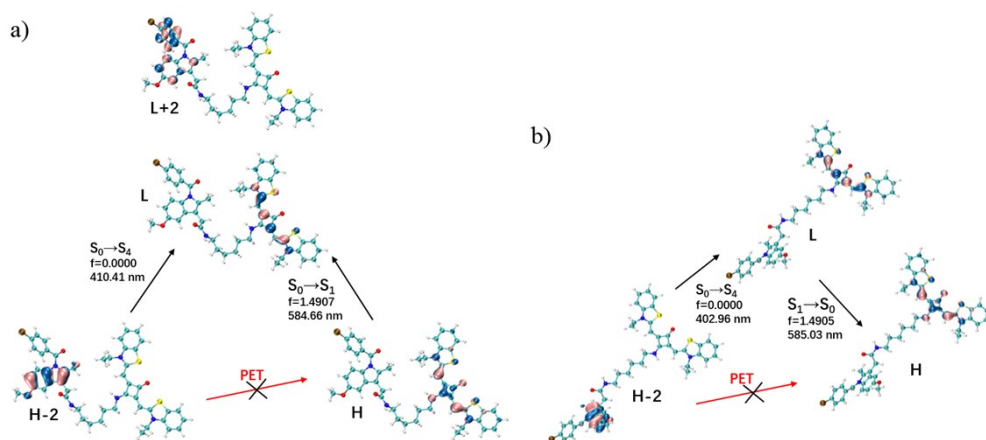

**Fig. S2.** Structural optimization and the frontier molecular orbital of folded (a) and (b) unfolded **IMC-DAH-SQ** calculated with time-dependent DFT using Gaussian 09.

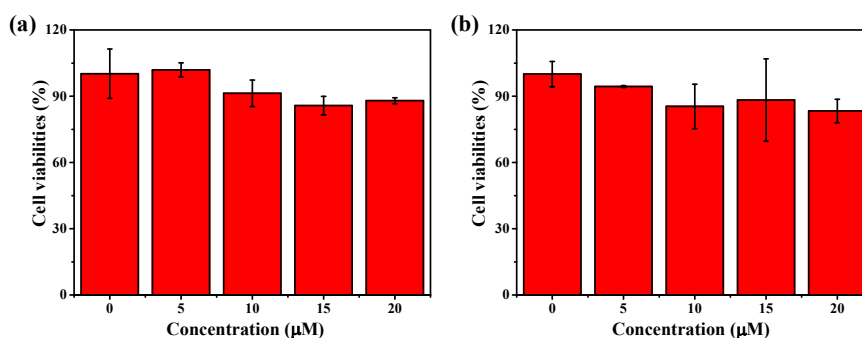

**Fig. S3.** Cell viability of **IMC-DAH-SQ** estimated by MTT assay. a) HepG-2 cells and b) HL7702 were incubated with different concentrations of **IMC-DAH-SQ** (0-20  $\mu\text{M}$ ) for 24 h.

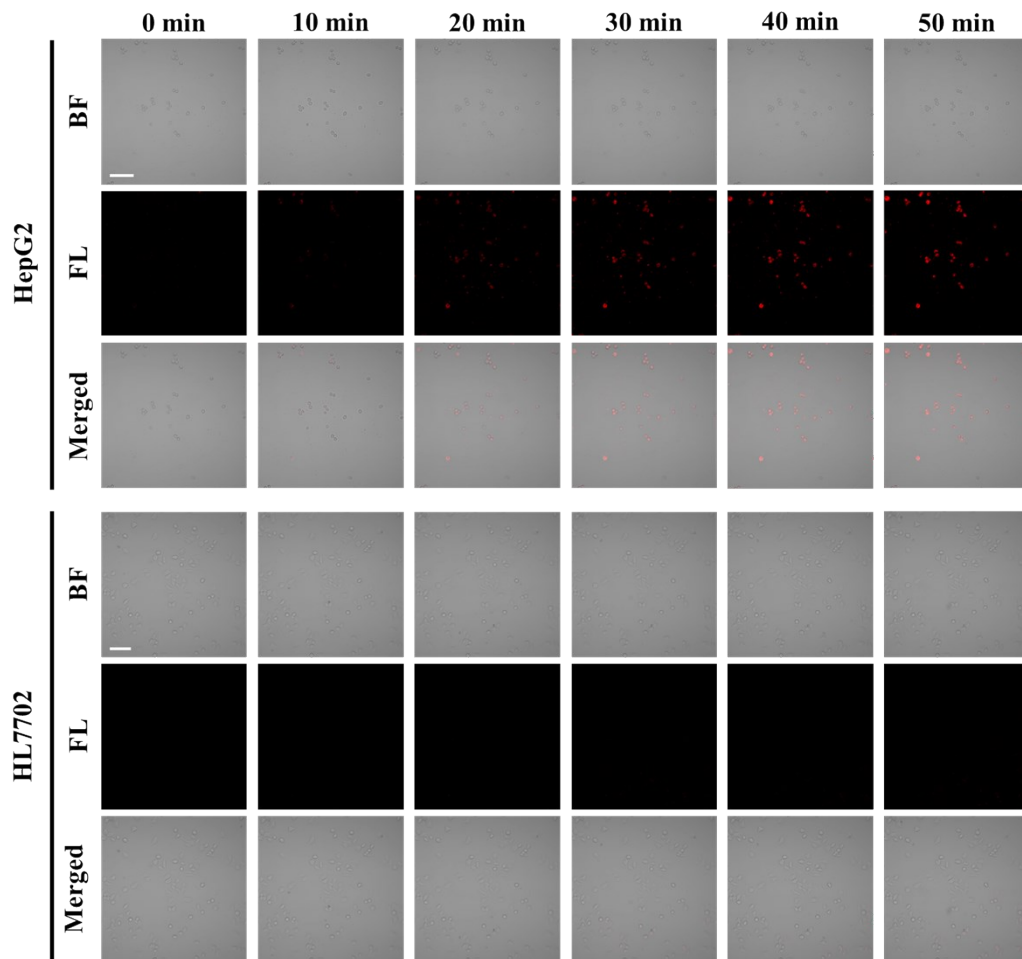

**Fig. S4.** Real-time fluorescence images of IMC-DAH-SQ in HepG2 and HL7702; Scale bar: 100  $\mu\text{m}$ .

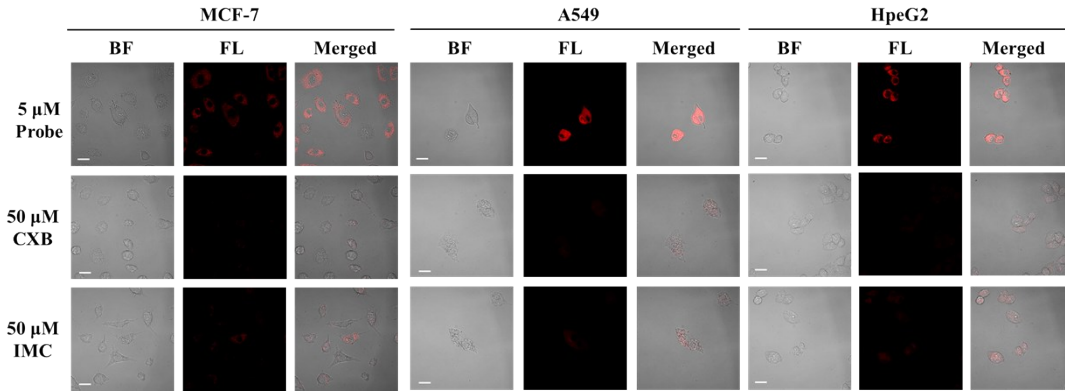

**Fig. S5.** The pre-incubation inhibitor experiment of COX-2. Cancer cell lines were pretreatment with COX-2 specific inhibitors (IMC and CXB, 50  $\mu$ M) for 16 h, then incubated with **IMC-DAH-SQ** (5  $\mu$ M) for another 30 min. Scar bar: 20  $\mu$ m.

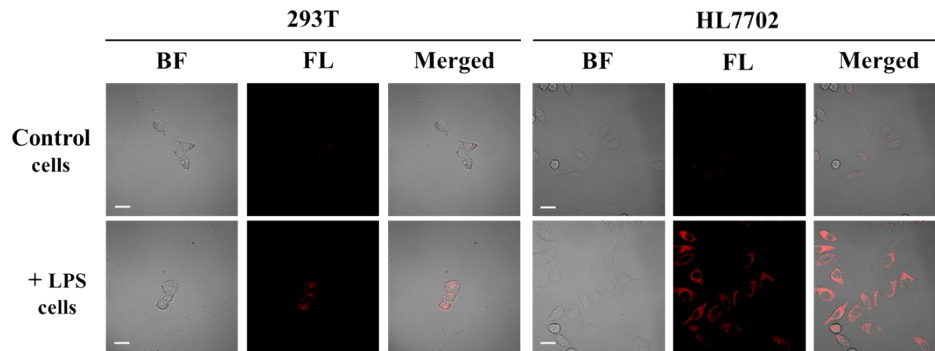

**Fig. S6.** The experiment of LPS up-regulates COX-2 levels in normal cell lines (293T and HL7702). The normal cells were processed with nanoprobe **IMC-DAH-SQ** for 0.5 h after incubated with LPS for 12 h. Scale bar: 20  $\mu$ m.

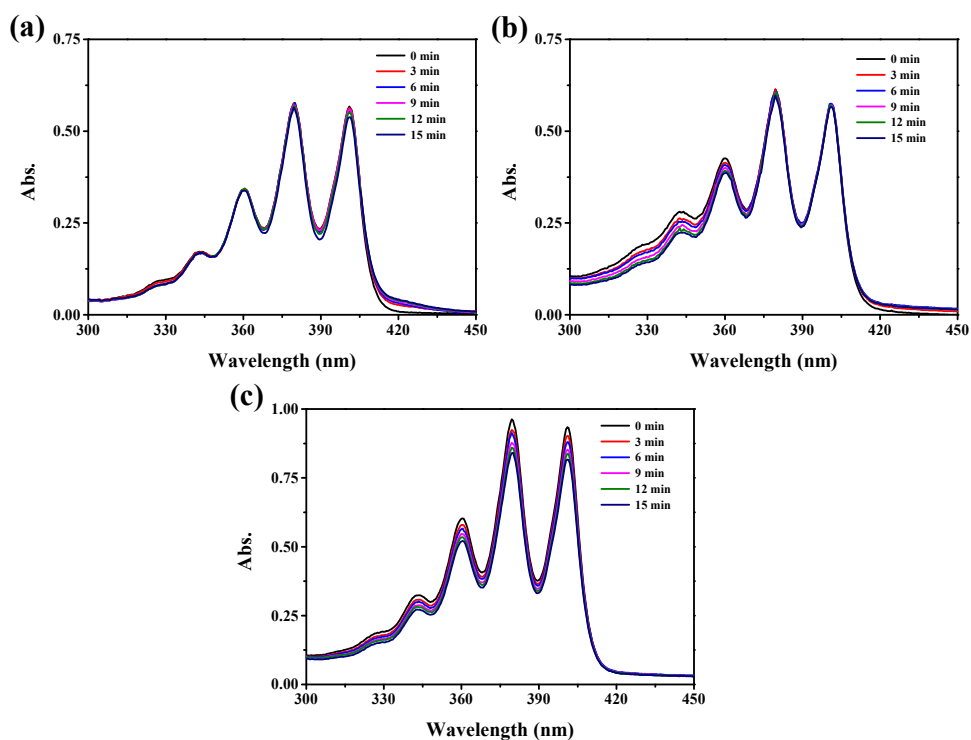

**Fig. S7.** UV-Vis spectra of 50  $\mu\text{M}$  ABDA upon mixing with (a) 5  $\mu\text{M}$  SQ, (b) 5  $\mu\text{M}$  IMC-DAH-SQ, (c) 5  $\mu\text{M}$  IMC-DAH-SQ+COX-2 followed by irradiation at a power density of 25  $\text{mW}/\text{cm}^2$  for different times.

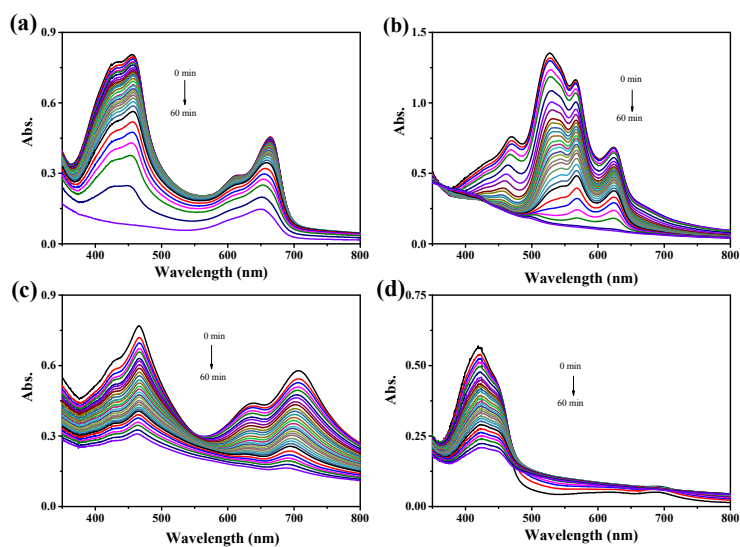

**Fig. S8.** UV-Vis absorption spectra change of DPBF in the presence of MB (a), SQ (b), IMC-DAH-SQ (c) and IMC-DAH-SQ with COX-2 (d) upon irradiation by laser at 630 nm for different time

in PBS (pH=7.4).

**Table S2.** ROS quantum yield of MB, SQ, **IMC-DAH-SQ** and **IMC-DAH-SQ+COX-2**.

| Substance               | $\Phi$         |
|-------------------------|----------------|
| <b>MB</b>               | <b>0.52</b>    |
| <b>SQ</b>               | <b>0.00665</b> |
| <b>IMC-DAH-SQ</b>       | <b>0.00567</b> |
| <b>IMC-DAH-SQ+COX-2</b> | <b>0.0352</b>  |

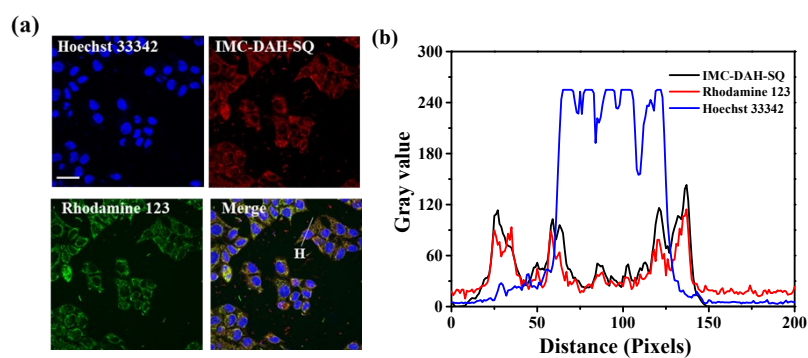

**Fig. S9.** (a) Co-localization fluorescence images of 5  $\mu$ M **IMC-DAH-SQ** and 5  $\mu$ M Rhodamine 123 in HepG2 cancer cells. The excitation wavelength is 635 nm and scanning range is 645-700 nm, the excitation wavelength for Rhodamine 123 is 488 nm and scanning range is 500-540 nm; (b) Plot profile of beeline H in merge channel of **IMC-DAH-SQ** and Rhodamine 123. Scale bar: 20  $\mu$ m.

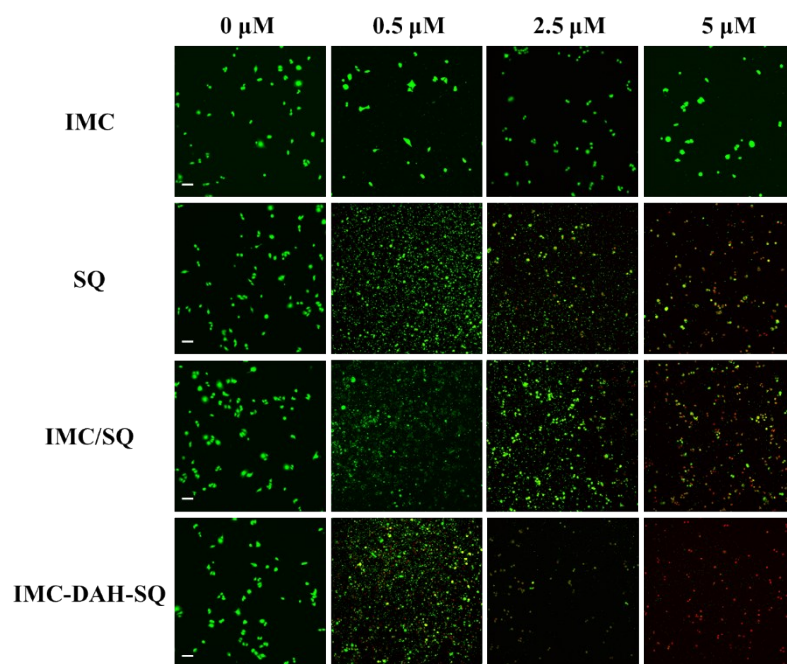

**Fig. S10.** The confocal imaging of Calcein-AM/PI with different concentration IMC, SQ, IMC/SQ mixture and **IMC-DAH-SQ** upon near-infrared light irradiation ( $25 \text{ mW cm}^{-2}$ , 12.5 min, 630 nm). Scale bar:  $100 \mu\text{m}$ .

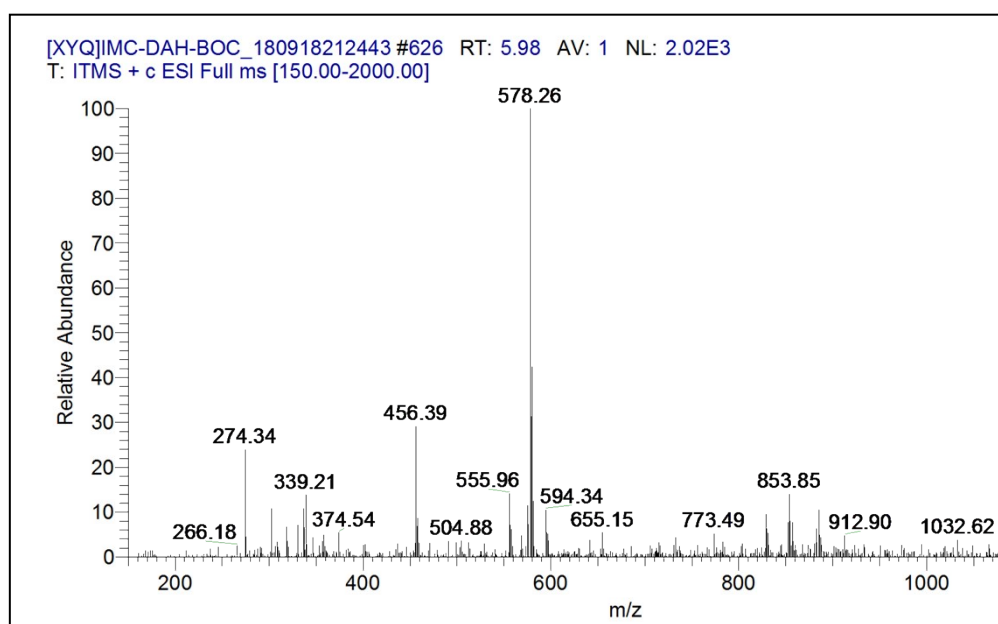

**Fig. S11.** ESI mass spectrum of IMC-DAH-Boc.



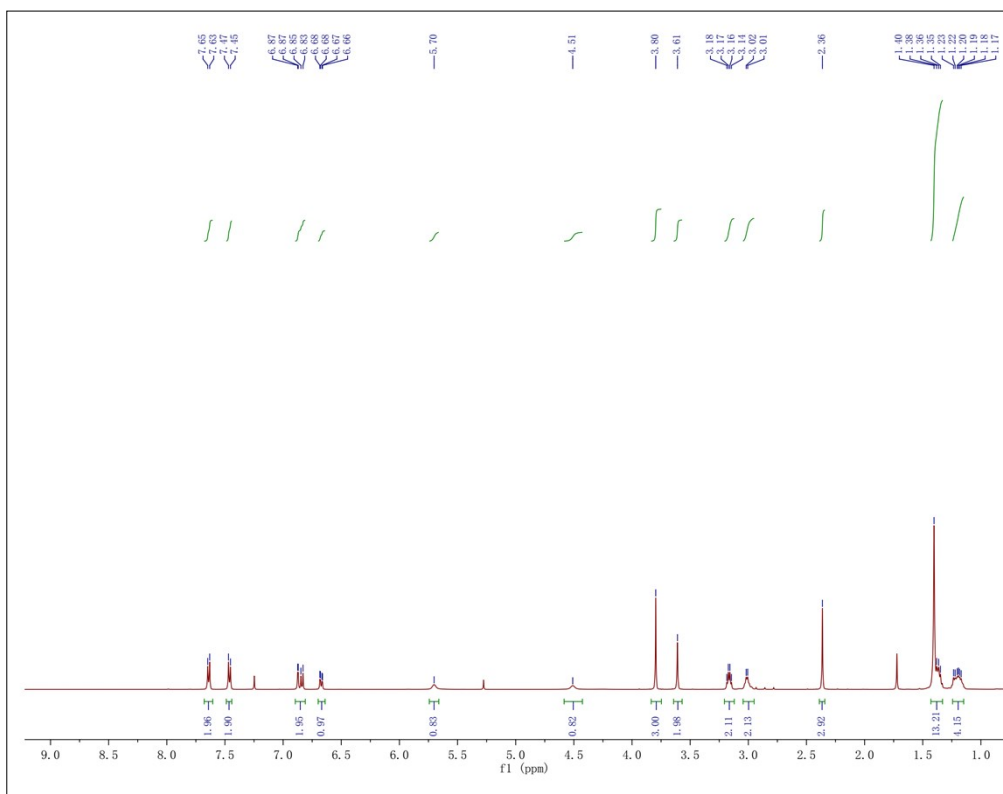

**Fig. S12.**  $^1\text{H}$  NMR spectrum of IMC-DAH-Boc in  $\text{CDCl}_3$  solvent.

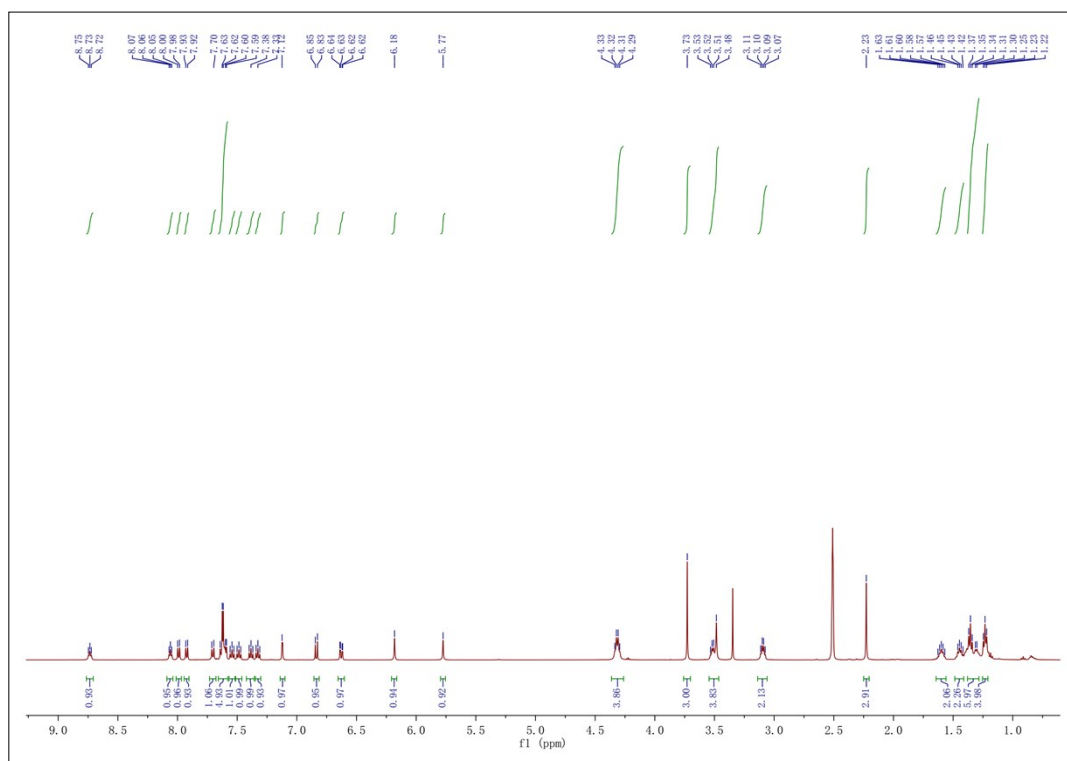

**Fig. S13.**  $^1\text{H}$  NMR spectrum of IMC-DAH-SQ in  $\text{DMSO-}d_6$  solvent.

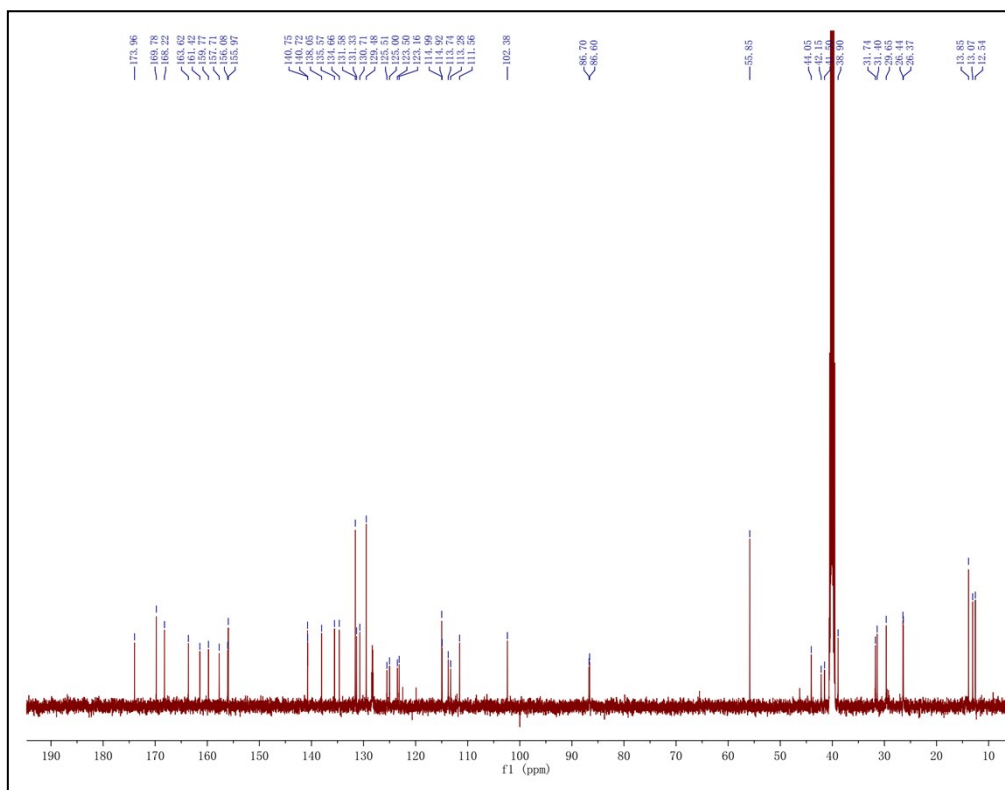

**Fig. S14.**  $^{13}\text{C}$  NMR spectrum of IMC-DAH-SQ in  $\text{DMSO-}d_6$  solvent.

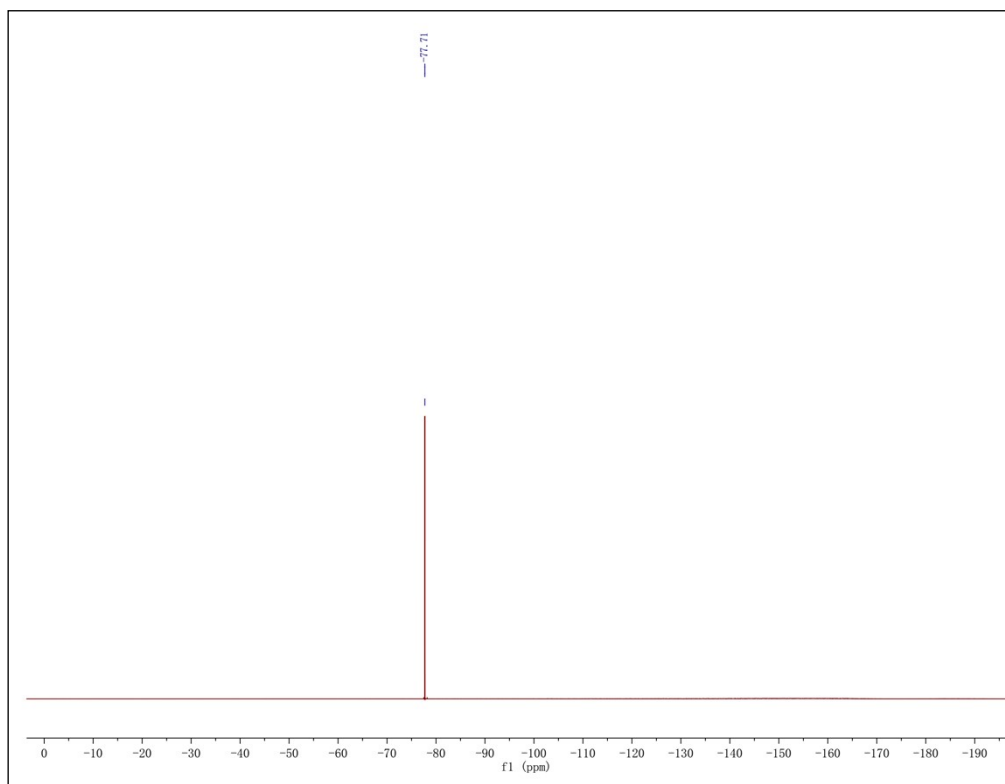

**Fig. S15.**  $^{19}\text{F}$  NMR spectrum of IMC-DAH-SQ in  $\text{DMSO-}d_6$  solvent.

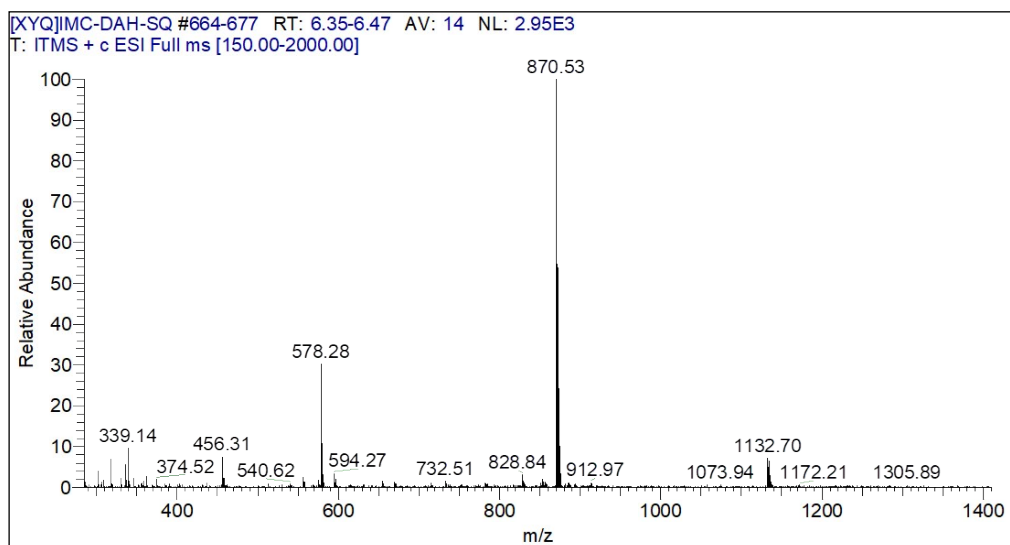

**Fig. S16.** ESI mass spectrum of IMC-DAH-SQ.

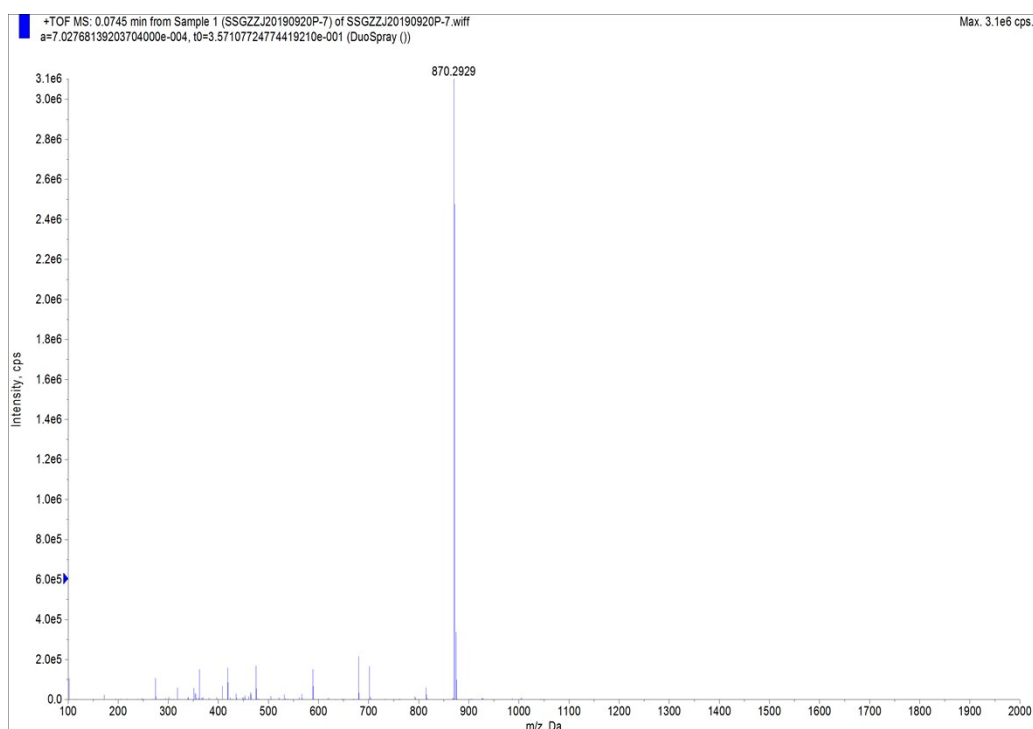

**Fig. S17.** TOF mass spectrum of IMC-DAH-SQ.
